# Supplementary material
Source: PubMed Central journal article supplement (PMC3257896)
Supplement: mmc1.pdf [file mmc1.pdf]

The American Journal of Human Genetics, Volume 90

## **Supplementary Data**

### **Rare Deletions at the Neurexin 3 Locus in Autism Spectrum Disorder**

Andrea K. Vaags, Anath C. Lionel, Daisuke Sato, McKinsey Goodenberger, Quinn P. Stein, Sarah Curran, Caroline Ogilvie, Joo Wook Ahn, Irene Drmic, Lili Senman, Christina Chrysler, Ann Thompson, Carolyn Russell, Aparna Prasad, Susan Walker, Dalila Pinto, Christian R. Marshall, Dimitri J. Stavropoulos, Lonnie Zwaigenbaum, Bridget A. Fernandez, Eric Fombonne, Patrick F Bolton, David Collier, Jennelle C. Hodge, Wendy Roberts, Peter Szatmari, and Stephen W. Scherer

## Family 1

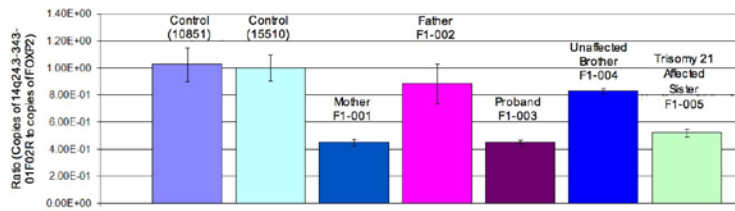

## Family 2

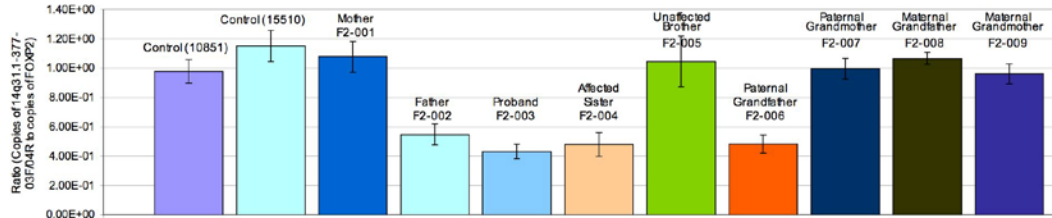

## Family 4

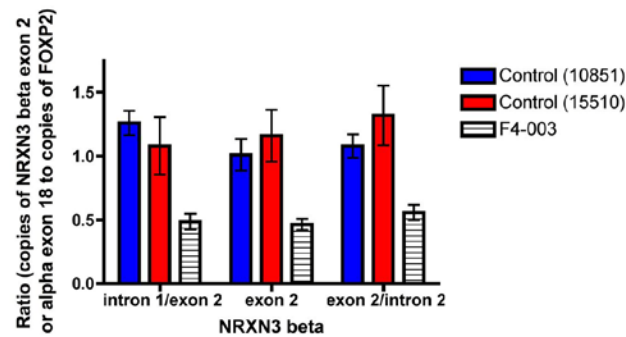

Figure S1. Quantitative polymerase chain reaction to detect copy number of 14q24.3 alleles in Family 1, 14q31.1 alleles in Family 2 and *NRXN3* *alpha* exon 13 / *beta* exon 2 in Family 4. Extended family members were included when DNA samples were available. Error bars represent the standard error of three independent reactions for each sample. Assays were completed at two independent genomic loci within the region of the deletion; one assay for each region is shown.

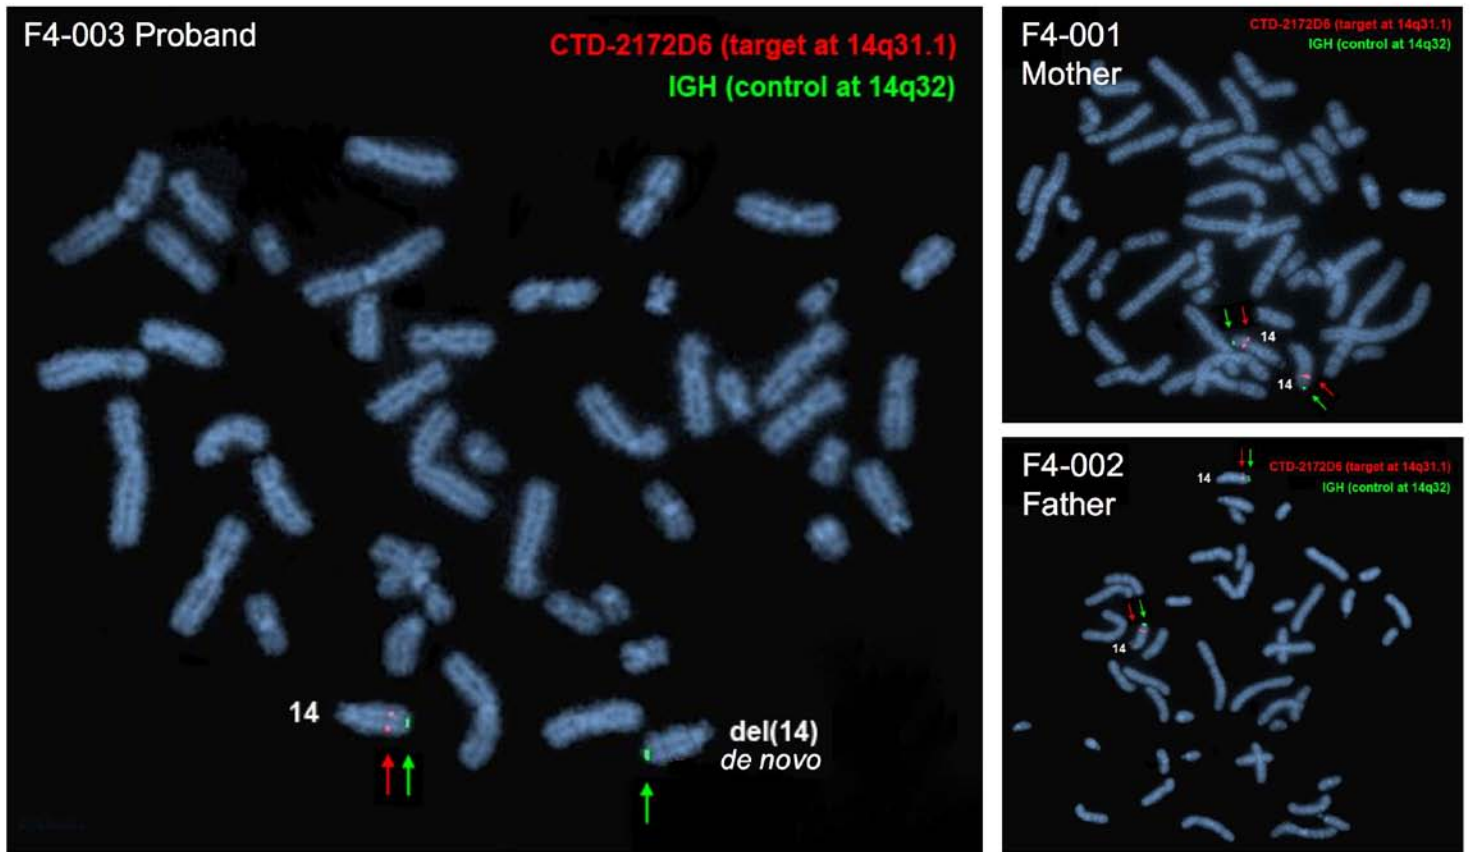

Figure S2. Fluorescence *in situ* hybridization (FISH) to detect copy number of 14q31.1 alleles in Family 4

The CTD-2172D6 probe was selected to overlap the deletion at 14q31.1, while the IGH probe at 14q32 was used as a control. Representative metaphase FISH for the proband (F4-003), mother (F4-001) and father (F4-002) are shown.

Table S1. Copy number variations detected by Affymetrix 6.0 and Illumina 1M Microarrays in proband F1-003

| Number | Microarray     | Chromosome and Band | Start (Build 36) | End (Build 36) | Estimated Size (bp) | CNV Type | Class <sup>a</sup>             |
|--------|----------------|---------------------|------------------|----------------|---------------------|----------|--------------------------------|
| 1      | Affymetrix 6.0 | 14q24.3             | 77,935,165       | 77,997,087     | 61,923              | loss     | likely pathogenic <sup>b</sup> |
|        | Illumina 1M    | 14q24.3             | 77,936,279       | 77,994,370     | 58,092              | loss     | likely pathogenic <sup>b</sup> |
| 2      | Illumina 1M    | 13q33.1             | 102,690,014      | 102,700,873    | 10,860              | gain     | likely benign                  |
| 3      | Affymetrix 6.0 | 1p36.13             | 17,067,742       | 17,134,834     | 67,093              | complex  | normal                         |
|        | Illumina 1M    | 1p36.13             | 17,086,470       | 17,140,083     | 53,614              | loss     | normal                         |
| 4      | Affymetrix 6.0 | 1p31.1              | 72,528,701       | 72,583,736     | 55,036              | loss     | normal                         |
| 5      | Affymetrix 6.0 | 1p13.3              | 110,025,907      | 110,044,476    | 18,570              | gain     | normal                         |
| 6      | Affymetrix 6.0 | 1q21.3              | 150,822,151      | 150,853,218    | 31,068              | loss     | normal                         |
| 7      | Affymetrix 6.0 | 2p22.3              | 34,552,819       | 34,590,561     | 37,743              | gain     | normal                         |
| 8      | Illumina 1M    | 3p11.1              | 90,390,913       | 90,576,572     | 185,660             | loss     | normal                         |
| 9      | Affymetrix 6.0 | 3q26.1              | 163,995,843      | 164,108,689    | 112,847             | gain     | normal                         |
| 10     | Illumina 1M    | 4p15.1              | 34,469,747       | 34,499,424     | 29,678              | loss     | normal                         |
| 11     | Illumina 1M    | 4p13                | 42,392,310       | 42,404,178     | 11,869              | loss     | normal                         |
| 12     | Affymetrix 6.0 | 4q13.2              | 70,162,233       | 70,273,689     | 111,457             | loss     | normal                         |
|        | Illumina 1M    | 4q13.2              | 70,190,735       | 70,246,877     | 56,143              | loss     | normal                         |
| 13     | Affymetrix 6.0 | 5p15.2              | 8,755,522        | 8,800,142      | 44,621              | loss     | normal                         |
|        | Illumina 1M    | 5p15.2              | 8,756,085        | 8,800,106      | 44,022              | loss     | normal                         |
| 14     | Illumina 1M    | 5q15                | 97,073,409       | 97,125,076     | 51,668              | loss     | normal                         |
|        | Affymetrix 6.0 | 5q15                | 97,075,856       | 97,125,440     | 49,585              | loss     | normal                         |
| 15     | Affymetrix 6.0 | 5q35.3              | 180,311,316      | 180,350,709    | 39,394              | loss     | normal                         |
| 16     | Illumina 1M    | 6p21.32             | 32,546,520       | 32,641,450     | 94,931              | gain     | normal                         |
| 17     | Illumina 1M    | 6p21.32             | 32,643,872       | 32,654,432     | 10,561              | loss     | normal                         |
| 18     | Illumina 1M    | 6p21.32             | 32,656,281       | 32,666,924     | 10,644              | gain     | normal                         |
| 19     | Illumina 1M    | 6p21.32             | 32,713,045       | 32,768,921     | 55,877              | loss     | normal                         |
| 20     | Affymetrix 6.0 | 6q14.1              | 77,496,587       | 77,509,523     | 12,937              | loss     | normal                         |
| 21     | Affymetrix 6.0 | 6q16.3              | 103,844,669      | 103,868,754    | 24,086              | loss     | normal                         |
| 22     | Illumina 1M    | 7p12.1              | 52,700,785       | 52,711,270     | 10,486              | gain     | normal                         |

|    |                |                  |             |             |         |      |        |
|----|----------------|------------------|-------------|-------------|---------|------|--------|
| 23 | Affymetrix 6.0 | 7q33             | 133,435,735 | 133,449,694 | 13,960  | loss | normal |
| 24 | Affymetrix 6.0 | 7q34             | 141,693,868 | 141,712,586 | 18,719  | loss | normal |
| 25 | Affymetrix 6.0 | 7q34             | 142,156,294 | 142,167,486 | 11,193  | gain | normal |
| 26 | Illumina 1M    | 8p11.23          | 39,351,896  | 39,497,557  | 145,662 | gain | normal |
|    | Affymetrix 6.0 | 8p11.23 - p11.22 | 39,354,760  | 39,506,122  | 151,363 | gain | normal |
| 27 | Affymetrix 6.0 | 9p21.3           | 24,487,680  | 24,507,682  | 20,003  | loss | normal |
|    | Illumina 1M    | 9p21.3           | 24,492,737  | 24,505,111  | 12,375  | loss | normal |
| 28 | Affymetrix 6.0 | 9p11.2           | 44,667,855  | 44,777,523  | 109,669 | gain | normal |
| 29 | Illumina 1M    | 9p11.2           | 44,844,429  | 45,270,306  | 425,878 | gain | normal |
| 29 | Affymetrix 6.0 | 10q22.3          | 81,475,459  | 81,487,784  | 12,326  | loss | normal |
| 30 | Affymetrix 6.0 | 12p13.31         | 9,525,137   | 9,619,559   | 94,423  | gain | normal |
| 31 | Affymetrix 6.0 | 13q13.3          | 36,970,036  | 36,982,757  | 12,722  | gain | normal |
| 32 | Affymetrix 6.0 | 14q32.33         | 105,950,876 | 105,989,153 | 38,278  | loss | normal |
| 33 | Affymetrix 6.0 | 15q11.2          | 22,226,226  | 22,269,689  | 43,464  | loss | normal |
| 34 | Illumina 1M    | 16p11.1          | 35,026,333  | 35,133,099  | 106,767 | loss | normal |
| 35 | Affymetrix 6.0 | 17p11.2          | 18,296,117  | 18,405,946  | 109,830 | loss | normal |
| 36 | Illumina 1M    | 17q12            | 31,462,326  | 31,499,244  | 36,919  | gain | normal |
|    | Affymetrix 6.0 | 17q12            | 31,464,091  | 31,559,764  | 95,674  | gain | normal |
| 37 | Illumina 1M    | 17q21.31         | 41,521,621  | 41,562,443  | 40,823  | gain | normal |
| 38 | Affymetrix 6.0 | 17q21.31- q21.32 | 41,756,832  | 42,107,479  | 350,648 | loss | normal |
|    | Illumina 1M    | 17q21.31-q21.32  | 41,792,236  | 41,914,286  | 122,051 | loss | normal |
| 39 | Affymetrix 6.0 | 20q13.2          | 52,081,215  | 52,092,058  | 10,844  | loss | normal |
| 40 | Illumina 1M    | 22q11.23         | 22,676,385  | 22,734,578  | 58,194  | loss | normal |
|    | Affymetrix 6.0 | 22q11.23         | 22,680,529  | 22,726,814  | 46,286  | loss | normal |
| 41 | Illumina 1M    | Xq21.31          | 88,349,201  | 88,416,721  | 67,521  | gain | normal |
|    | Illumina 1M    | Xq21.31          | 88,956,094  | 89,138,513  | 182,420 | gain | normal |

<sup>a</sup>Classification based on Tsuchiya et al.<sup>54</sup>

<sup>b</sup>Inherited from mother as determined by qPCR

Table S2. Copy number variations detected by Illumina 2.5M Microarray in Down syndrome affected sister F1-005

| Number | Chromosome and Band | Start (Build 36) | End (Build 36) | Estimated Size (bp) | CNV Type | Class <sup>a</sup>             |
|--------|---------------------|------------------|----------------|---------------------|----------|--------------------------------|
| 1      | 21q11.2-q22.3       | 13,356,041       | 46,924,583     | 33,568,542          | gain     | pathogenic <sup>b</sup>        |
| 2      | 14q24.3             | 77,934,476       | 77,996,225     | 61,750              | loss     | likely pathogenic <sup>c</sup> |
| 3      | 7p12.1              | 52,696,385       | 52,718,059     | 21,675              | gain     | normal                         |
| 4      | 12q24.21            | 112,973,178      | 113,043,270    | 70,093              | gain     | normal                         |
| 5      | 1p21.1              | 103,948,080      | 104,012,569    | 64,490              | loss     | normal                         |
| 6      | 1q44                | 246,807,195      | 246,861,733    | 54,539              | loss     | normal                         |
| 7      | 4p13                | 42,392,310       | 42,403,451     | 11,142              | loss     | normal                         |
| 8      | 4p13.2              | 69,056,964       | 69,130,187     | 73,224              | loss     | normal                         |
| 9      | 6q12                | 67,068,621       | 67,105,606     | 36,986              | loss     | normal                         |
| 10     | 7q34                | 142,155,670      | 142,172,913    | 17,244              | loss     | normal                         |
| 11     | 8p23.2              | 5,582,919        | 5,593,114      | 10,196              | loss     | normal                         |
| 12     | 9p21.3              | 24,492,737       | 24,508,795     | 16,059              | loss     | normal                         |
| 13     | 15q22.2             | 59,475,461       | 59,485,471     | 10,011              | loss     | normal                         |
| 14     | 16q23.1             | 76,930,395       | 76,941,010     | 10,616              | loss     | normal                         |
| 15     | 17q21.31            | 41,522,422       | 41,580,958     | 58,537              | gain     | normal                         |
| 16     | 19p12               | 20,392,846       | 20,512,500     | 119,655             | loss     | normal                         |

<sup>a</sup>Classification based on Tsuchiya et al.<sup>54</sup>

<sup>b</sup>Trisomy 21

<sup>c</sup>Inherited from mother as determined by qPCR

Table S3. Single nucleotide variants (SNVs) detected by exome sequencing of individuals with *NRXN3* deletions

| <b>Sample</b> | <b>Alignment with</b>        | <b>Total</b> | <b>Exonic</b> | <b>Exonic novel</b> | <b>Exonic novel</b>       | <b>Exonic novel</b>    |
|---------------|------------------------------|--------------|---------------|---------------------|---------------------------|------------------------|
| <b>ID</b>     | <b>HuRef<sup>a</sup> (%)</b> | <b>SNVs</b>  | <b>SNVs</b>   | <b>SNVs</b>         | <b>nonsynonymous SNVs</b> | <b>synonymous SNVs</b> |
| F1-003        | 67                           | 60,629       | 22,196        | 8,346               | 5,897                     | 2,107                  |
| F2-003        | 72                           | 102,743      | 38,934        | 22,858              | 16,690                    | 5,386                  |

<sup>a</sup>HuRef, human reference genome NCBI Build 37/hg19

Table S4. Nonsynonymous mutations within ASD-associated or neuronally-expressed genes detected by exome sequencing of families with *NRXN3* CNVs

| ID     | Chr | Position<br>(NCBI 37/<br>hg19) | SNP | Substitution | Damaging<br>or<br>Tolerated <sup>a</sup> | Gene    | Exon<br>number | OMIM<br>Identifier <sup>b</sup> | Inheritance                                                                |
|--------|-----|--------------------------------|-----|--------------|------------------------------------------|---------|----------------|---------------------------------|----------------------------------------------------------------------------|
| F1-003 | 3   | 74,334,560                     | C/T | R867Q        | Tolerated                                | CNTN3   | 19             | *601325                         | Paternal, not present in sibs                                              |
|        | 9   | 39,171,471                     | C/T | G410S        | Tolerated                                | CNTNAP3 | 8              | -                               | Paternal, present in F1-005 (DS sister)                                    |
|        | 22  | 41,513,727                     | G/A | G211S        | Tolerated                                | EP300   | 2              | *602700                         | Paternal, not present in sibs                                              |
| F2-003 | 2   | 125,669,092                    | G/A | R1234Q       | Tolerated                                | CNTNAP5 | 23             | -                               | Paternal <sup>c</sup> , present in F2-004 (AF sister)                      |
|        | 3   | 121,340,620                    | T/G | I115S        | Damaging                                 | FBXO40  | 3              | *609107                         | Paternal <sup>c</sup> , present in F2-004 (AF sister), F2-005 (UN brother) |
|        | 7   | 32,209,524                     | G/C | L61V         | Damaging                                 | PDE1C   | 3              | *602987                         | Paternal <sup>c</sup> , present in F2-005 (UN brother)                     |
|        | 9   | 79,324,017                     | T/C | E1058G       | Damaging                                 | PRUNE2  | 8              | *610691                         | Paternal <sup>c</sup> , not present in sibs                                |
|        | 15  | 80,847,464                     | G/A | R383H        | Damaging                                 | ARNT2   | 11             | *606036                         | Paternal <sup>c</sup> , not present in sibs                                |

Abbreviations: Chr, chromosome; NCBI 37/hg19, NCBI Build 37/human genome 19; SNP, single nucleotide polymorphism; OMIM, On-line Mendelian Inheritance in Man gene locus identifier; -, unassigned; sibs, siblings; DS, Down's syndrome affected; AF, ASD affected; UN, ASD unaffected.

<sup>a</sup>Damaging amino acid substitutions were identified by SIFT

<sup>b</sup>In OMIM, \* indicates a gene but no known phenotype

<sup>c</sup>Father (F2-002) inherited mutation from paternal grandfather (F2-006)



Table S5. Copy number variations detected by 1M Illumina and Agilent 1M Microarray in ASD-affected proband, F2-003

| Number | Microarray  | Chromosome and Band | Start (Build 36) | End (Build 36) | Estimated Size (bp) | CNV Type | Class <sup>a</sup>                           |
|--------|-------------|---------------------|------------------|----------------|---------------------|----------|----------------------------------------------|
| 1      | Illumina 1M | 14q31.1             | 79,194,519       | 79,484,830     | 290,312             | loss     | likely pathogenic <sup>b</sup>               |
|        | Agilent 1M  | 14q31.1             | 79,195,282       | 79,484,992     | 289,711             | loss     | likely pathogenic <sup>b</sup>               |
| 2      | Agilent 1M  | 10q25.3             | 118,140,835      | 118,275,879    | 135,045             | gain     | uncertain clinical significance <sup>c</sup> |
|        | Illumina 1M | 10q25.3             | 118,146,973      | 118,273,902    | 126,930             | gain     | uncertain clinical significance <sup>c</sup> |
| 3      | Illumina 1M | 1p36.11             | 25,470,863       | 25,537,253     | 66,391              | loss     | normal                                       |
| 4      | Agilent 1M  | 1p31.1              | 72,538,943       | 72,579,511     | 40,569              | loss     | normal                                       |
| 5      | Illumina 1M | 1p21.1              | 103,969,301      | 104,094,454    | 125,154             | loss     | normal                                       |
| 6      | Agilent 1M  | 1q21.3              | 150,822,873      | 150,851,639    | 28,767              | loss     | normal                                       |
| 7      | Agilent 1M  | 2p11.2              | 88,913,881       | 88,939,755     | 25,875              | loss     | normal                                       |
| 8      | Illumina 1M | 2q37.3              | 242,568,437      | 242,597,673    | 29,237              | loss     | normal                                       |
|        | Agilent 1M  | 2q37.3              | 242,571,023      | 242,597,073    | 26,051              | loss     | normal                                       |
| 9      | Agilent 1M  | 3q26.1              | 164,009,121      | 164,027,924    | 18,804              | loss     | normal                                       |
|        | Illumina 1M | 3q26.1              | 164,037,547      | 164,101,579    | 64,033              | loss     | normal                                       |
| 10     | Illumina 1M | 3q26.31             | 176,555,296      | 176,570,084    | 14,789              | loss     | normal                                       |
| 11     | Agilent 1M  | 3q29                | 196,835,213      | 196,961,438    | 126,226             | gain     | normal                                       |
| 12     | Illumina 1M | 4q13.1              | 64,378,106       | 64,392,223     | 14,118              | loss     | normal                                       |
| 13     | Illumina 1M | 4q13.2              | 69,064,675       | 69,186,276     | 121,602             | gain     | normal                                       |
|        | Agilent 1M  | 4q13.2              | 69,069,451       | 69,166,014     | 96,564              | gain     | normal                                       |
| 14     | Illumina 1M | 5p15.33             | 806,256          | 873,185        | 66,930              | loss     | normal                                       |
| 15     | Illumina 1M | 5q33.2              | 155,410,444      | 155,421,495    | 11,052              | loss     | normal                                       |
| 16     | Agilent 1M  | 5q35.3              | 180,344,764      | 180,362,542    | 17,779              | loss     | normal                                       |
| 17     | Agilent 1M  | 6p25.3              | 201,863          | 324,098        | 122,236             | gain     | normal                                       |
| 18     | Illumina 1M | 6p21.33             | 29,959,422       | 30,007,126     | 47,705              | loss     | normal                                       |
|        | Agilent 1M  | 6p21.33             | 29,962,649       | 30,022,108     | 59,460              | loss     | normal                                       |
| 19     | Agilent 1M  | 6p21.32             | 32,563,052       | 32,601,162     | 38,111              | loss     | normal                                       |

|    |             |                 |             |             |           |      |        |
|----|-------------|-----------------|-------------|-------------|-----------|------|--------|
| 20 | Agilent 1M  | 6p21.32         | 32,716,055  | 32,731,272  | 15,218    | gain | normal |
|    | Illumina 1M | 6p21.32         | 32,717,159  | 32,739,978  | 22,820    | gain | normal |
| 21 | Illumina 1M | 6p12.1          | 55,934,096  | 55,954,486  | 20,391    | loss | normal |
|    | Agilent 1M  | 6p12.1          | 55,934,616  | 55,950,698  | 16,083    | loss | normal |
| 22 | Agilent 1M  | 6q14.1          | 79,024,357  | 79,085,447  | 61,091    | loss | normal |
|    | Illumina 1M | 6q14.1          | 79,029,649  | 79,090,197  | 60,549    | loss | normal |
| 23 | Illumina 1M | 7p21.1          | 17,519,409  | 17,533,175  | 13,767    | loss | normal |
| 24 | Agilent 1M  | 7q33            | 133,436,065 | 133,448,477 | 12,413    | loss | normal |
| 25 | Illumina 1M | 10q11.22        | 47,004,995  | 47,173,876  | 168,882   | gain | normal |
|    | Agilent 1M  | 10q11.22        | 47,021,215  | 47,172,734  | 151,520   | gain | normal |
| 26 | Agilent 1M  | 10q23.1         | 82,869,226  | 82,881,404  | 12,179    | loss | normal |
| 27 | Illumina 1M | 11p15.4         | 7,774,010   | 7,785,071   | 11,062    | loss | normal |
| 28 | Illumina 1M | 11p11.12        | 49,669,405  | 49,701,670  | 32,266    | loss | normal |
| 29 | Agilent 1M  | 14q32.33        | 105,314,054 | 105,416,596 | 102,543   | gain | normal |
| 30 | Agilent 1M  | 14q32.33        | 105,607,372 | 105,632,368 | 24,997    | loss | normal |
| 31 | Agilent 1M  | 14q32.33        | 105,951,199 | 105,989,360 | 38,162    | loss | normal |
| 32 | Illumina 1M | 15q26.2         | 95,616,714  | 95,633,191  | 16,478    | loss | normal |
| 33 | Agilent 1M  | 16p11.2         | 32,378,926  | 33,559,407  | 1,180,482 | gain | normal |
| 34 | Agilent 1M  | 16p11.1,16p11.2 | 34,325,301  | 34,602,518  | 277,218   | gain | normal |
| 35 | Agilent 1M  | 16q22.1         | 68,732,167  | 68,753,409  | 21,243    | gain | normal |
| 36 | Agilent 1M  | 16q23.1         | 76,929,398  | 76,940,418  | 11,021    | loss | normal |
| 37 | Illumina 1M | 18q22.1-q22.2   | 64,895,268  | 64,906,488  | 11,221    | loss | normal |
| 38 | Agilent 1M  | 19q13.2         | 46,046,659  | 46,063,557  | 16,899    | gain | normal |
|    | Illumina 1M | 19q13.2         | 46,047,894  | 46,073,380  | 25,487    | gain | normal |
| 39 | Agilent 1M  | 19q13.42        | 59,420,997  | 59,434,402  | 13,406    | loss | normal |
|    | Illumina 1M | 19q13.42        | 59,423,491  | 59,435,029  | 11,539    | loss | normal |
| 40 | Agilent 1M  | 20p13           | 1,511,432   | 1,525,500   | 14,069    | loss | normal |
| 41 | Agilent 1M  | 22p13           | 402,446     | 415,655     | 13,210    | loss | normal |
| 42 | Illumina 1M | 22q13.1         | 37,693,776  | 37,711,772  | 17,997    | loss | normal |
| 43 | Illumina 1M | Xq21.31         | 88,597,748  | 89,049,558  | 451,811   | gain | normal |

<sup>a</sup>Classification based on Tsuchiya et al.<sup>54</sup>

<sup>b</sup>Inherited from the father as determined by qPCR  
<sup>c</sup>Inherited from the mother as determined by SNP genotyping

Table S6. Copy number variations detected by Affymetrix 6.0 Microarray in ASD-affected sister, F2-004

| Number | Chromosome and Band | Start (Build 36) | End (Build 36) | Estimated Size (bp) | CNV Type | Class <sup>a</sup>                           |
|--------|---------------------|------------------|----------------|---------------------|----------|----------------------------------------------|
| 1      | 14q31.1             | 79,194,993       | 79,486,637     | 291,645             | loss     | likely pathogenic <sup>b</sup>               |
| 2      | 10q25.3             | 118,146,569      | 118,277,144    | 130,576             | gain     | uncertain clinical significance <sup>c</sup> |
| 3      | Xq12                | 65,686,393       | 65,850,049     | 163,657             | gain     | uncertain clinical significance <sup>c</sup> |
| 4      | 3p14.1              | 68,701,371       | 68,725,422     | 24,052              | gain     | likely benign                                |
| 5      | 6q14.1              | 77,372,550       | 77,384,004     | 11,455              | loss     | likely benign                                |
| 6      | 6q22.31             | 118,746,238      | 118,762,441    | 16,204              | loss     | likely benign                                |
| 7      | 15q21.3             | 52,979,930       | 53,038,725     | 58,796              | loss     | likely benign                                |
| 8      | 18q21.33            | 59,325,725       | 59,341,262     | 15,538              | loss     | likely benign                                |
| 9      | 1p36.11             | 25,465,715       | 25,534,799     | 69,085              | loss     | normal                                       |
| 10     | 1p31.1              | 72,528,701       | 72,583,736     | 55,036              | complex  | normal                                       |
| 11     | 1q21.3              | 150,821,800      | 150,853,218    | 31,419              | loss     | normal                                       |
| 12     | 3q21.3              | 129,878,180      | 129,895,021    | 16,842              | gain     | normal                                       |
| 13     | 3q26.1              | 163,989,224      | 164,109,297    | 120,074             | loss     | normal                                       |
| 14     | 4p16.1              | 9,823,254        | 9,844,366      | 21,113              | gain     | normal                                       |
| 15     | 4q13.2              | 69,043,083       | 69,168,574     | 125,492             | loss     | normal                                       |
| 16     | 5q35.3              | 180,311,316      | 180,350,709    | 39,394              | loss     | normal                                       |
| 17     | 6p21.33             | 31,394,255       | 31,404,430     | 10,176              | loss     | normal                                       |
| 18     | 6p21.32             | 32,539,530       | 32,682,359     | 142,830             | gain     | normal                                       |
| 19     | 6q14.1              | 79,025,784       | 79,091,904     | 66,121              | loss     | normal                                       |
| 20     | 7q34                | 141,693,581      | 141,711,917    | 18,337              | gain     | normal                                       |
| 21     | 7q34                | 142,155,609      | 142,176,424    | 20,816              | loss     | normal                                       |
| 22     | 7q35                | 143,501,019      | 143,719,492    | 218,474             | gain     | normal                                       |
| 23     | 8p11.23-p11.22      | 39,354,760       | 39,506,122     | 151,363             | loss     | normal                                       |
| 24     | 9p21.3              | 23,353,115       | 23,363,484     | 10,370              | loss     | normal                                       |
| 25     | 10q11.22            | 46,337,321       | 46,467,605     | 130,285             | gain     | normal                                       |
| 26     | 10q11.22            | 46,482,317       | 47,012,099     | 529,783             | gain     | normal                                       |

|    |                 |             |             |         |      |        |
|----|-----------------|-------------|-------------|---------|------|--------|
| 27 | 10q11.22        | 47,012,100  | 47,173,619  | 161,520 | gain | normal |
| 28 | 11q11           | 55,130,608  | 55,209,585  | 78,978  | loss | normal |
| 29 | 14q11.2         | 19,270,023  | 19,493,212  | 223,190 | gain | normal |
| 30 | 14q32.33        | 105,601,409 | 105,638,145 | 36,737  | loss | normal |
| 31 | 14q32.33        | 105,950,876 | 105,989,694 | 38,819  | loss | normal |
| 32 | 15q26.2         | 95,618,796  | 95,634,656  | 15,861  | loss | normal |
| 33 | 16p12.3         | 19,853,151  | 19,874,863  | 21,713  | loss | normal |
| 34 | 16p11.1-p11.2   | 34,324,072  | 34,614,572  | 290,501 | gain | normal |
| 35 | 16q12.2         | 54,353,890  | 54,379,945  | 26,056  | loss | normal |
| 36 | 16q12.2         | 54,399,883  | 54,420,211  | 20,329  | gain | normal |
| 37 | 16q23.1         | 76,929,941  | 76,942,266  | 12,326  | loss | normal |
| 38 | 17q21.31-q21.32 | 41,563,921  | 42,120,174  | 556,254 | loss | normal |
| 39 | 19q13.12        | 40,541,333  | 40,553,688  | 12,356  | loss | normal |
| 40 | 19q13.31        | 48,394,873  | 48,448,077  | 53,205  | loss | normal |
| 41 | 19q13.41        | 58,210,559  | 58,244,245  | 33,687  | gain | normal |
| 42 | 21q11.2         | 13,374,733  | 13,463,240  | 88,508  | loss | normal |
| 43 | 22q13.1         | 37,693,565  | 37,705,253  | 11,689  | loss | normal |
| 44 | Xq21.31         | 89,781,704  | 89,798,514  | 16,811  | loss | normal |

<sup>a</sup>Classification based on Tsuchiya et al.<sup>54</sup>

<sup>b</sup>Inherited from the father as determined by qPCR

<sup>c</sup>Inherited from the mother as determined by SNP genotyping

Table S7. Copy number variations detected by Agilent 244K Microarray in ASD-affected proband, F4-003

| Number | Chromosome and Band | Start (Build 36) | End (Build 36) | Estimated Size (bp) | CNV Type  | Class <sup>a</sup>                           |
|--------|---------------------|------------------|----------------|---------------------|-----------|----------------------------------------------|
| 1      | 14q31.1             | 78,780,965       | 78,998,022     | 217,058             | loss      | likely pathogenic <sup>b</sup>               |
| 2      | 2q12.2-q12.3        | 106,244,482      | 107,899,060    | 1,654,579           | loss      | uncertain clinical significance <sup>c</sup> |
| 3      | 7q35                | 143,515,304      | 143,694,327    | 179,024             | loss      | likely benign                                |
| 4      | 14q11.2             | 19,287,128       | 19,491,517     | 204,390             | gain      | likely benign                                |
| 5      | Yq11.223-q11.23     | 22,926,984       | 26,611,063     | 3,684,080           | gain      | likely benign                                |
| 6      | 1p36.13             | 16,746,296       | 16,857,821     | 111,525             | loss      | normal                                       |
| 7      | 1p36.13             | 16,926,444       | 16,996,364     | 69,920              | loss      | normal                                       |
| 8      | 1q21.1              | 144,323,050      | 144,651,248    | 328,199             | loss      | normal                                       |
| 9      | 1q21.1              | 147,098,951      | 147,134,234    | 35,283              | loss      | normal                                       |
| 10     | 1q21.1              | 147,307,637      | 147,490,646    | 183,010             | loss      | normal                                       |
| 11     | 1q44                | 246,794,552      | 246,857,555    | 63,004              | loss      | normal                                       |
| 12     | 2p12                | 82,059,920       | 82,159,192     | 99,273              | gain      | normal                                       |
| 13     | 2q37.3              | 242,514,593      | 242,677,125    | 162,533             | loss      | normal                                       |
| 14     | 3q12.2              | 101,830,256      | 101,928,155    | 97,900              | gain      | normal                                       |
| 15     | 3q26.1              | 163,996,796      | 164,101,835    | 105,040             | loss      | normal                                       |
| 16     | 4q13.2              | 69,057,324       | 69,173,429     | 116,106             | loss      | normal                                       |
| 17     | 5p15.33             | 794,369          | 894,992        | 100,624             | loss      | normal                                       |
| 18     | 6p25.3              | 181,142          | 238,493        | 57,352              | loss      | normal                                       |
| 19     | 6q27                | 168,081,602      | 168,324,063    | 242,462             | gain      | normal                                       |
| 20     | 7q22.1              | 100,757,569      | 100,925,126    | 167,558             | gain      | normal                                       |
| 21     | 7q22.1              | 101,915,687      | 102,107,694    | 192,008             | gain      | normal                                       |
| 22     | 8p23.1              | 7,103,471        | 7,843,639      | 740,169             | loss      | normal                                       |
| 23     | 10q11.21-q11.22     | 45,986,585       | 47,026,056     | 1,039,472           | loss      | normal                                       |
| 24     | 10q11.22            | 48,460,600       | 48,946,999     | 486,400             | loss      | normal                                       |
| 25     | 11q11               | 55,124,730       | 55,207,364     | 82,635              | homo gain | normal                                       |
| 26     | 12q12               | 36,739,877       | 37,147,772     | 407,896             | loss      | normal                                       |

|    |                 |             |             |         |           |        |
|----|-----------------|-------------|-------------|---------|-----------|--------|
| 27 | 15q13.2         | 28,160,686  | 28,697,443  | 536,758 | gain      | normal |
| 28 | 15q13.3         | 30,321,464  | 30,594,576  | 273,113 | gain      | normal |
| 29 | 15q14           | 32,474,245  | 32,772,324  | 298,080 | gain      | normal |
| 30 | 16p13.11-p12.3  | 16,611,886  | 16,755,263  | 143,378 | gain      | normal |
| 31 | 16p12.3         | 18,150,085  | 18,695,395  | 545,311 | gain      | normal |
| 32 | 17q12           | 31,541,821  | 31,574,772  | 32,952  | gain      | normal |
| 33 | 17q21.31-q21.32 | 41,793,792  | 41,919,687  | 125,896 | gain      | normal |
| 34 | 17q21.32        | 42,035,410  | 42,117,798  | 82,389  | gain      | normal |
| 35 | Xp22.33         | 17,768      | 102,197     | 84,430  | homo loss | normal |
| 36 | Xq28            | 153,064,329 | 153,158,732 | 94,404  | loss      | normal |

<sup>a</sup>Classification based on Tsuchiya et al. <sup>54</sup>

<sup>b</sup>*de novo* as determined by FISH

<sup>c</sup>Inherited from mother as determined by FISH

Table S8. Sanger sequencing of *NRXN3* variants in 350 ASD cases

| Sample                          | Primer  | Variant                                        | Genomic Position <sup>a</sup> | Type     | Inheritance                                          | Comments                                                                                                                                         |
|---------------------------------|---------|------------------------------------------------|-------------------------------|----------|------------------------------------------------------|--------------------------------------------------------------------------------------------------------------------------------------------------|
| MMPPro3-D11<br>(female proband) | FA/RA   | <u><i>c19G&gt;A(het),<br/>A7[T,A]</i></u>      | g78,816,406                   | missense | <u><i>maternal</i></u> ; also in UN sib              | low conservation, Alanine (hydrophobic) → Threonine (polar neutral). Also rare 4.6 Mb 2q37.3 deletion.                                           |
| MMPPro2-D7<br>(male proband)    | F2/R2   | <u><i>c128G&gt;A(het),<br/>R43[H,R]</i></u>    | g78,245,338                   | missense | <u><i>paternal</i></u> , also in UN sib              | highly conserved, Arginine (basic, polar) → histidine (basic, polar). No other rare CNVs.                                                        |
| MMPPro3-E4<br>(male proband)    | F6/R6   | <u><i>c1219C&gt;T(het),<br/>R407[R,W]</i></u>  | g78,493,400                   | missense | <u><i>maternal</i></u> ; also in matGF and 2 UN sibs | highly conserved, Arginine (basic,polar) → Tryptophan (hydrophobic, neutral, slightly polar). Also rare 260 kb 22q12.3 del and 37 kb 4q34.3 del. |
| SKPro4-E3<br>(female sibling)   | F15/R15 | <u><i>c3118G&gt;A(het),<br/>E1040[E,K]</i></u> | g79,397,992                   | missense | <u><i>maternal</i></u>                               | dx changed to not-ASD, highly conserved, glutamic acid (acidic, polar) → Lysine (basic, polar). No other rare CNVs.                              |

Abbreviations: UN, unaffected; matGF, maternal grandfather; dx, diagnosis. Primer3 software v. 0.4.0

(<http://frodo.wi.mit.edu/primer3>) was used to design PCR primers for standard PCR. Products were purified and sequenced directly using BigDye Terminator sequencing (Applied Biosystems, Foster City, CA, USA). Novel variants detected in the cases and controls, not previously reported in the Single Nucleotide Polymorphism Database (dbSNP) build 130, were validated by re-sequencing the proband and samples from both parents and siblings, when available.

<sup>a</sup>NCBI 36 (hg 18)
